# Supplementary material for: Antibiotic use as a risk factor for inflammatory bowel disease across the ages: a population-based cohort study
Source: HighWire-hosted journal article supplement (doi:10.1136/gutjnl-2022-327845), 2023-01-09

# Risk of developing IBD according to...

## ...Time since last course of antibiotics

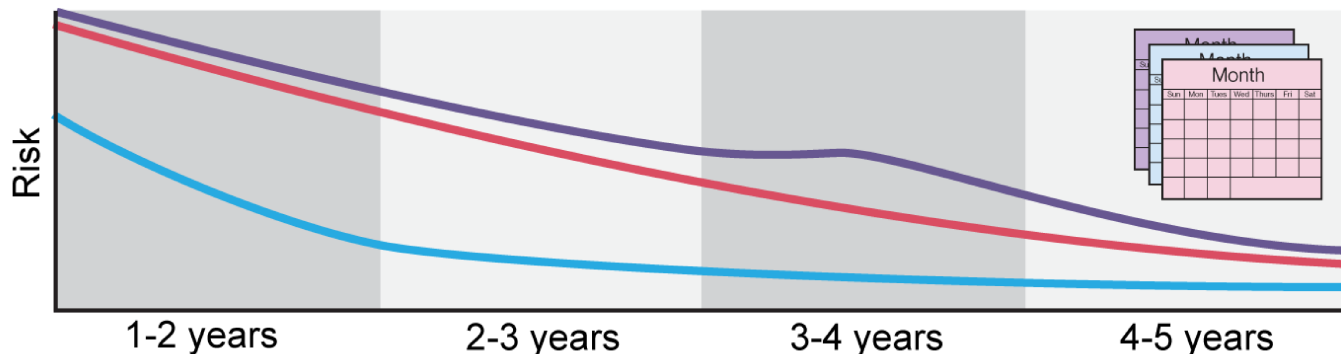

## ...Antibiotic class

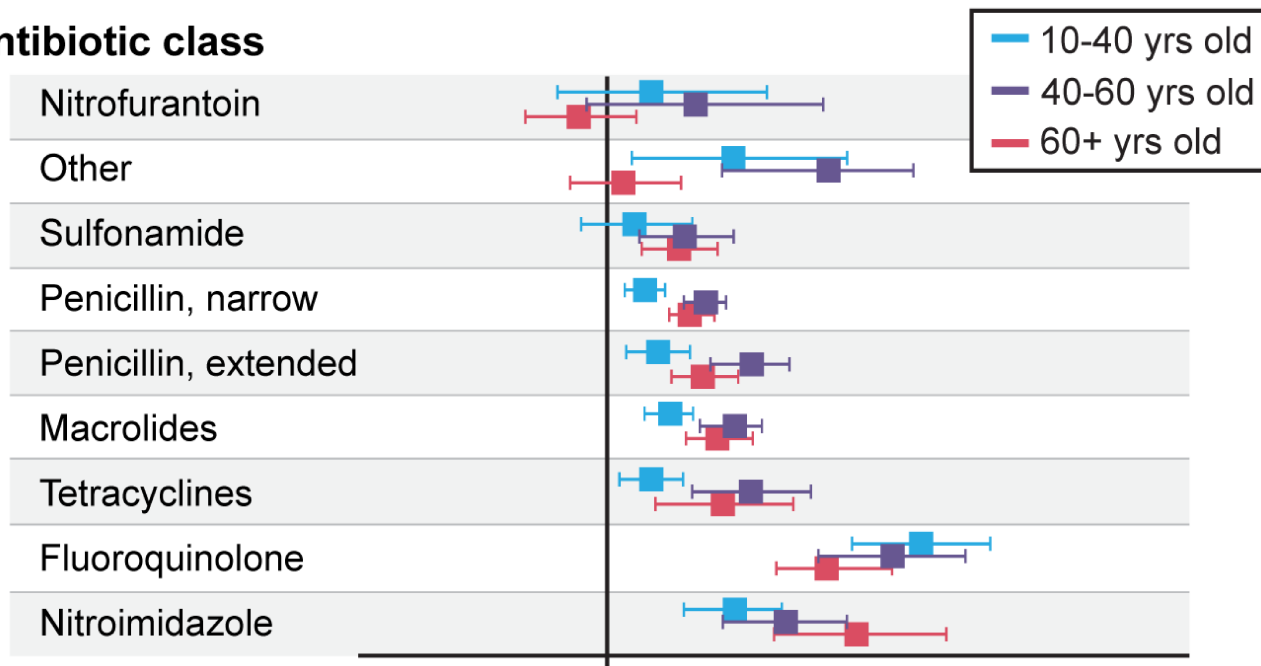

## ...Number of courses of antibiotics

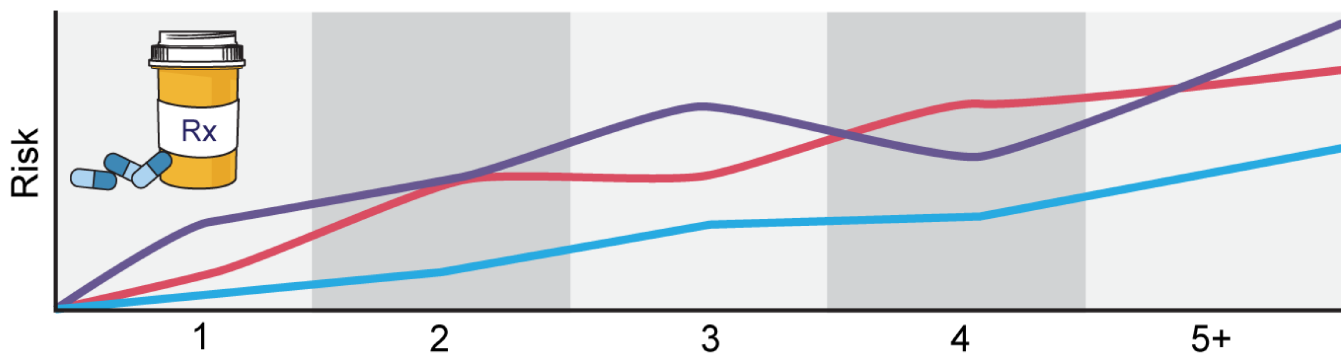

Supplement: gutjnl-2022-327845supp001_data_supplement.pdf [file gutjnl-2022-327845supp001_data_supplement.pdf]
