# Supplementary material for: Antibiotic use as a risk factor for inflammatory bowel disease across the ages: a population-based cohort study
Source: HighWire-hosted journal article supplement (doi:10.1136/gutjnl-2022-327845), 2023-01-09
Supplement: gutjnl-2022-327845supp002_data_supplement.pdf [file gutjnl-2022-327845supp002_data_supplement.pdf]

**Supplementary Table 1: Antibiotic groupings**

|                      |                                                                                                                                                      |
|----------------------|------------------------------------------------------------------------------------------------------------------------------------------------------|
| Nitrofurantoin       | Nitrofurantoin                                                                                                                                       |
| Penicillin, narrow   | Phenoxymethylpenicillin<br>Pivmecillinam<br>Dicloxacillin<br>Flucloxacillin<br>Benzylpenicillin<br>Cloxacillin<br>Methicillin<br>Procaine penicillin |
| Penicillin, extended | Amoxicillin +/- enzyme-inhibitor<br>Pivampicillin<br>Ampicillin<br>Bacampicillin<br>Mecillinam<br>Piperacillin +/- enzyme-inhibitor<br>Meropenem     |
| Sulfonamides         | Sulfamethizol<br>Trimethoprim<br>Sulfamethoxazole +/- Trimethoprim                                                                                   |
| Tetracyclines        | Doxycycline<br>Tetracycline<br>Lymecycline<br>Oxytetracycline<br>Chlortetracycline                                                                   |
| Macrolides           | Roxithromycin<br>Azithromycin<br>Erythromycin<br>Clarithromycin<br>Spiramycin                                                                        |
| Nitroimidazoles      | Metronidazole                                                                                                                                        |
| Fluoroquinolones     | Ciprofloxacin<br>Oxofloxacin<br>Moxifloxacin<br>Fleroxacin<br>Grepafloxacin<br>Norfloxacin<br>Trovfloxacin                                           |

|       |                                                                                                                                                                                                                                                                                                  |
|-------|--------------------------------------------------------------------------------------------------------------------------------------------------------------------------------------------------------------------------------------------------------------------------------------------------|
|       | Levofloxacin                                                                                                                                                                                                                                                                                     |
| Other | Clindamycin<br>Methenamine<br>Cefuroxime<br>Cefalexin<br>Ceftriaxone<br>Cefpodoxime<br>Ceftazidime<br>Cefotaxime<br>Fusidinsyre<br>Nalidixinsyre<br>Colistin<br>Linezolid<br>Vancomycin<br>Gentamicin<br>Tobramycin<br>Fosfomycin<br>Chloramphenicol<br>Tigecycline<br>Netilmicin<br>Teicoplanin |

**Supplementary Table 2: Antiviral and antifungal agents adjusted for**

|                          |                                                                                                                                                                                                                                                |
|--------------------------|------------------------------------------------------------------------------------------------------------------------------------------------------------------------------------------------------------------------------------------------|
| <b><u>Antifungal</u></b> | <b>Azoles</b><br>Ketoconazole<br>Itraconazole<br>Fluconazole<br>Voriconazole<br>Posaconazole<br>Isavuconazole<br>Oteseconazole<br><br><b>Polyene</b><br>Amphotericin B<br><br><b>Echinocandin</b><br>Capsfungin<br>Micafungin<br>Anidulafungin |
| <b><u>Antiviral</u></b>  | <b><u>Pathogens:</u></b><br><b>Herpes Simplex Virus</b><br>Valacyclovir<br>Acyclovir<br>Famciclovir<br><br><b>Influenza</b><br>Oseltamivir<br>Peramivir<br>Zanamivir<br>Laninamivir<br>Baloxavir<br><br><b>Cytomegalovirus</b><br>Ganciclovir  |

**Supplementary Table 3:** Incidence rate ratios of IBD, UC and CD, including a two-year lag after antibiotic exposure

| Age group   | IRR*, IBD | IRR lower bound, IBD | IRR upper bound, IBD | IRR*, CD | IRR lower bound, CD | IRR upper bound, CD | IRR*, UC | IRR lower bound, UC | IRR upper bound, UC |
|-------------|-----------|----------------------|----------------------|----------|---------------------|---------------------|----------|---------------------|---------------------|
| 10-40 years | 1.20      | 1.16                 | 1.24                 | 1.27     | 1.21                | 1.34                | 1.16     | 1.11                | 1.21                |
| 40-60 years | 1.36      | 1.30                 | 1.41                 | 1.42     | 1.31                | 1.54                | 1.33     | 1.27                | 1.40                |
| ≥60 years   | 1.32      | 1.26                 | 1.37                 | 1.32     | 1.21                | 1.44                | 1.32     | 1.25                | 1.39                |

\*Adjusted for sex, calendar time, antiviral and antifungal exposure, PPI exposure, SEI and population density

**Supplemental Table 4:** Interaction between sex and number of antibiotic doses

| Age group   | Sex    | Number of antibiotic doses | Person-years | Number of IBD cases | IRR*  | IRR lower bound | IRR upper bound |
|-------------|--------|----------------------------|--------------|---------------------|-------|-----------------|-----------------|
| 10-40 years | Female | 0                          | 5,410,564    | 2,687               | 1.000 | .               | .               |
| 10-40 years | Female | 1                          | 4,255,639    | 2,683               | 1.178 | 1.116           | 1.242           |
| 10-40 years | Female | 2                          | 2,863,030    | 2,103               | 1.285 | 1.213           | 1.361           |
| 10-40 years | Female | 3                          | 1,849,036    | 1,575               | 1.417 | 1.331           | 1.509           |
| 10-40 years | Female | 4                          | 1,176,246    | 1,112               | 1.510 | 1.407           | 1.620           |
| 10-40 years | Female | 5+                         | 2,036,676    | 2,309               | 1.683 | 1.590           | 1.782           |
| 10-40 years | Male   | 0                          | 8,675,210    | 4,389               | 1.000 | .               | .               |
| 10-40 years | Male   | 1                          | 4,950,134    | 2,875               | 1.125 | 1.073           | 1.179           |
| 10-40 years | Male   | 2                          | 2,387,095    | 1,491               | 1.183 | 1.115           | 1.254           |
| 10-40 years | Male   | 3                          | 1,130,735    | 791                 | 1.291 | 1.197           | 1.393           |
| 10-40 years | Male   | 4                          | 547,969      | 431                 | 1.427 | 1.293           | 1.576           |
| 10-40 years | Male   | 5+                         | 635,646      | 604                 | 1.643 | 1.508           | 1.789           |
| 40-60 years | Female | 0                          | 4,267,089    | 1,631               | 1.000 | .               | .               |
| 40-60 years | Female | 1                          | 3,381,304    | 1,641               | 1.223 | 1.142           | 1.310           |
| 40-60 years | Female | 2                          | 2,227,315    | 1,321               | 1.448 | 1.346           | 1.557           |
| 40-60 years | Female | 3                          | 1,406,730    | 907                 | 1.530 | 1.411           | 1.660           |
| 40-60 years | Female | 4                          | 886,195      | 629                 | 1.642 | 1.497           | 1.800           |
| 40-60 years | Female | 5+                         | 1,689,196    | 1,710               | 2.194 | 2.048           | 2.349           |
| 40-60 years | Male   | 0                          | 6,234,746    | 2,392               | 1.000 | .               | .               |
| 40-60 years | Male   | 1                          | 3,718,138    | 1,939               | 1.313 | 1.237           | 1.395           |
| 40-60 years | Male   | 2                          | 1,890,876    | 1,104               | 1.430 | 1.332           | 1.536           |
| 40-60 years | Male   | 3                          | 947,651      | 657                 | 1.660 | 1.522           | 1.809           |
| 40-60 years | Male   | 4                          | 490,764      | 382                 | 1.809 | 1.623           | 2.016           |
| 40-60 years | Male   | 5+                         | 674,263      | 606                 | 2.003 | 1.832           | 2.190           |
| 60+ years   | Female | 0                          | 3,847,849    | 1,711               | 1.000 | .               | .               |
| 60+ years   | Female | 1                          | 2,895,592    | 1,582               | 1.184 | 1.106           | 1.268           |

| Age group | Sex    | Number of antibiotic doses | Person-years | Number of IBD cases | IRR*  | IRR lower bound | IRR upper bound |
|-----------|--------|----------------------------|--------------|---------------------|-------|-----------------|-----------------|
| 60+ years | Female | 2                          | 1,921,692    | 1,296               | 1.415 | 1.317           | 1.521           |
| 60+ years | Female | 3                          | 1,252,271    | 915                 | 1.496 | 1.381           | 1.622           |
| 60+ years | Female | 4                          | 823,685      | 724                 | 1.754 | 1.608           | 1.914           |
| 60+ years | Female | 5+                         | 1,989,662    | 2,122               | 2.010 | 1.885           | 2.144           |
| 60+ years | Male   | 0                          | 4,111,990    | 1,861               | 1.000 | .               | .               |
| 60+ years | Male   | 1                          | 2,661,174    | 1,562               | 1.244 | 1.163           | 1.331           |
| 60+ years | Male   | 2                          | 1,523,269    | 1,078               | 1.453 | 1.348           | 1.566           |
| 60+ years | Male   | 3                          | 868,932      | 661                 | 1.518 | 1.389           | 1.659           |
| 60+ years | Male   | 4                          | 507,786      | 440                 | 1.695 | 1.528           | 1.881           |
| 60+ years | Male   | 5+                         | 976,182      | 977                 | 1.866 | 1.726           | 2.017           |

\*Adjusted for calendar time, antiviral and antifungal exposure, PPI exposure, SEI and population density

**Supplementary Table 5:** Increase in incidence rate ratio per antibiotic course

| Description                | Age group   | IRR*, IBD | IRR lower bound, IBD | IRR upper bound, IBD | IRR*, CD | IRR lower bound, CD | IRR upper bound, CD | IRR*, UC | IRR lower bound, UC | IRR upper bound, UC |
|----------------------------|-------------|-----------|----------------------|----------------------|----------|---------------------|---------------------|----------|---------------------|---------------------|
| Increase in IRR per course | 10-40 years | 1.1072    | 1.0984               | 1.1159               | 1.1460   | 1.1315              | 1.1607              | 1.0814   | 1.0705              | 1.0924              |
| Increase in IRR per course | 40-60 years | 1.1510    | 1.1404               | 1.1617               | 1.2005   | 1.1802              | 1.2212              | 1.1324   | 1.1199              | 1.1449              |
| Increase in IRR per course | 60+ years   | 1.1374    | 1.1274               | 1.1474               | 1.1541   | 1.1346              | 1.1739              | 1.1330   | 1.1214              | 1.1447              |

\*Adjusted for sex, calendar time, antiviral and antifungal exposure, PPI exposure, SEI and population density
